# Supplementary material for: Coordination polymers of polyamine and macrocycles controlled by pyridine-containing arms
Source: Royal Society of Chemistry journal article supplement (doi:10.1039/c2ce25547b), 2012-01-01
Supplement: c2ce25547b.pdf [file c2ce25547b.pdf]

Table 3 Hydrogen bond parameters for complexes **1- 4**

| Complex  | D-H...A       | d(D-H) | d(H...A) | d(D...A) | ∠DHA     |
|----------|---------------|--------|----------|----------|----------|
| <b>1</b> | N7-H7A...O22  | 0.899  | 2.449    | 3.341    | 171.4(2) |
|          | N3-H3D...O23  | 0.901  | 2.263    | 3.142    | 165.4(2) |
|          | N3-H3C...O44  | 0.900  | 2.197    | 3.089    | 170.92   |
|          | C10-H10...O43 | 0.930  | 2.356    | 3.223    | 154.9(3) |
|          | C9-H9...O13   | 0.929  | 2.469    | 3.267    | 143.9(3) |
|          | N7-H7B...O14  | 0.901  | 2.104    | 2.942    | 154.2(2) |
|          | N1-H1C...O41  | 0.900  | 2.273    | 3.143    | 162.6(2) |
| <b>2</b> | O7-H7D...O4   | 0.851  | 2.024    | 2.615    | 125.8(5) |
|          | O4-H4C...O6   | 0.850  | 2.588    | 3.366    | 152.6(5) |
|          | O4-H4B...N3   | 0.850  | 2.393    | 2.733    | 104.5(5) |
| <b>3</b> | C33-H33A...O2 | 0.959  | 1.790    | 2.325    | 111.9(2) |
|          | C33-H33B...O1 | 0.960  | 1.817    | 2.734    | 158.9(2) |
|          | C33-H33B...O2 | 0.960  | 2.129    | 2.325    | 89.3(2)  |
| <b>4</b> | C8-H8A...O6   | 0.990  | 2.489    | 3.411    | 154.7(3) |
|          | C7-H7...O6    | 0.950  | 2.486    | 3.326    | 147.3(3) |
|          | O7-H7A...O3   | 0.851  | 2.326    | 3.070    | 146.2(6) |
|          | C24-H24B...O7 | 0.990  | 2.583    | 3.538    | 162.2(3) |
